# Supplementary material
Source: PubMed Central journal article supplement (PMC3490201)

# THE LANCET **Neurology**

## **Supplementary webappendix**

This webappendix formed part of the original submission and has been peer reviewed. We post it as supplied by the authors.

Supplement to: Whitwell JL, Dickson DW, Murray ME, et al. Neuroimaging correlates of pathologically defined subtypes of Alzheimer's disease: a case-control study. *Lancet Neurol* 2012; published online Sep 3. [http://dx.doi.org/10.1016/S1474-4422\(12\)70200-4](http://dx.doi.org/10.1016/S1474-4422(12)70200-4).

**Supplemental Table 1: Imaging and pathological data for typical Alzheimer’s disease (AD) with predominant memory impairment versus typical AD with predominant impairment in another domain\***

|                                                               | Typical AD<br>Memory<br>( <i>n</i> = 98) | Typical AD<br>Other<br>( <i>n</i> = 25) | <i>p</i> -value† |
|---------------------------------------------------------------|------------------------------------------|-----------------------------------------|------------------|
| <b>Gray matter volume scaled by total intracranial volume</b> |                                          |                                         |                  |
| Hippocampus/cortex ratio                                      | 0.041 (0.031, 0.057)                     | 0.045 (0.035, 0.056)                    | 0.001            |
| Hippocampus                                                   | 0.45 (0.28, 0.60)                        | 0.47 (0.36, 0.56)                       | 0.05             |
| Amygdala                                                      | 0.13 (0.08, 0.16)                        | 0.13 (0.10, 0.16)                       | 0.04             |
| Entorhinal cortex                                             | 0.18 (0.10, 0.26)                        | 0.19 (0.13, 0.24)                       | 0.04             |
| Parahippocampal gyrus                                         | 0.19 (0.14, 0.23)                        | 0.18 (0.14, 0.24)                       | 0.64             |
| Substantia innominata                                         | 0.02 (0.01, 0.02)                        | 0.01 (0.01, 0.02)                       | 0.01             |
| Striatum                                                      | 0.83 (0.56, 1.24)                        | 0.77 (0.63, 0.96)                       | 0.03             |
| Thalamus                                                      | 0.29 (0.21, 0.39)                        | 0.28 (0.21, 0.37)                       | 0.19             |
| Orbitofrontal cortex                                          | 1.91 (1.32, 2.61)                        | 1.96 (1.56, 2.43)                       | 0.32             |
| Lateral frontal lobe                                          | 3.99 (2.63, 5.11)                        | 3.89 (3.17, 4.76)                       | 0.67             |
| Lateral temporal lobe                                         | 4.43 (2.83, 5.98)                        | 4.22 (3.65, 4.90)                       | 0.03             |
| Lateral parietal lobe                                         | 2.33 (1.38, 3.22)                        | 2.24 (1.48, 2.94)                       | 0.10             |
| Precuneus                                                     | 1.22 (0.78, 1.61)                        | 1.18 (0.90, 1.43)                       | 0.18             |
| Cingulum                                                      | 1.63 (1.20, 2.01)                        | 1.64 (1.42, 1.88)                       | 0.48             |
| <b>Neurofibrillary tangle count</b>                           |                                          |                                         |                  |
| Middle frontal                                                | 4 (0, 25)                                | 10 (0, 22)                              | 0.01             |
| Superior temporal                                             | 7 (0, 33)                                | 12 (2, 32)                              | 0.009            |
| Inferior parietal                                             | 5 (0, 30)                                | 12 (0, 31)                              | 0.001            |
| Hippocampus CA1                                               | 10 (1, 45)                               | 13 (1, 30)                              | 0.83             |
| Hippocampus subiculum                                         | 16 (0, 66)                               | 17 (0, 53)                              | 0.83             |

Data shown as median (range)

\* Two subjects could not be categorized based on limited clinical data.

† Based on two-sample *t*-test with unequal variances. Nonparametric rank-sum test results were very similar

Supplemental Figure 1: patterns of grey matter loss in each Alzheimer's disease subtype compared with the entire cohort of 177 controls

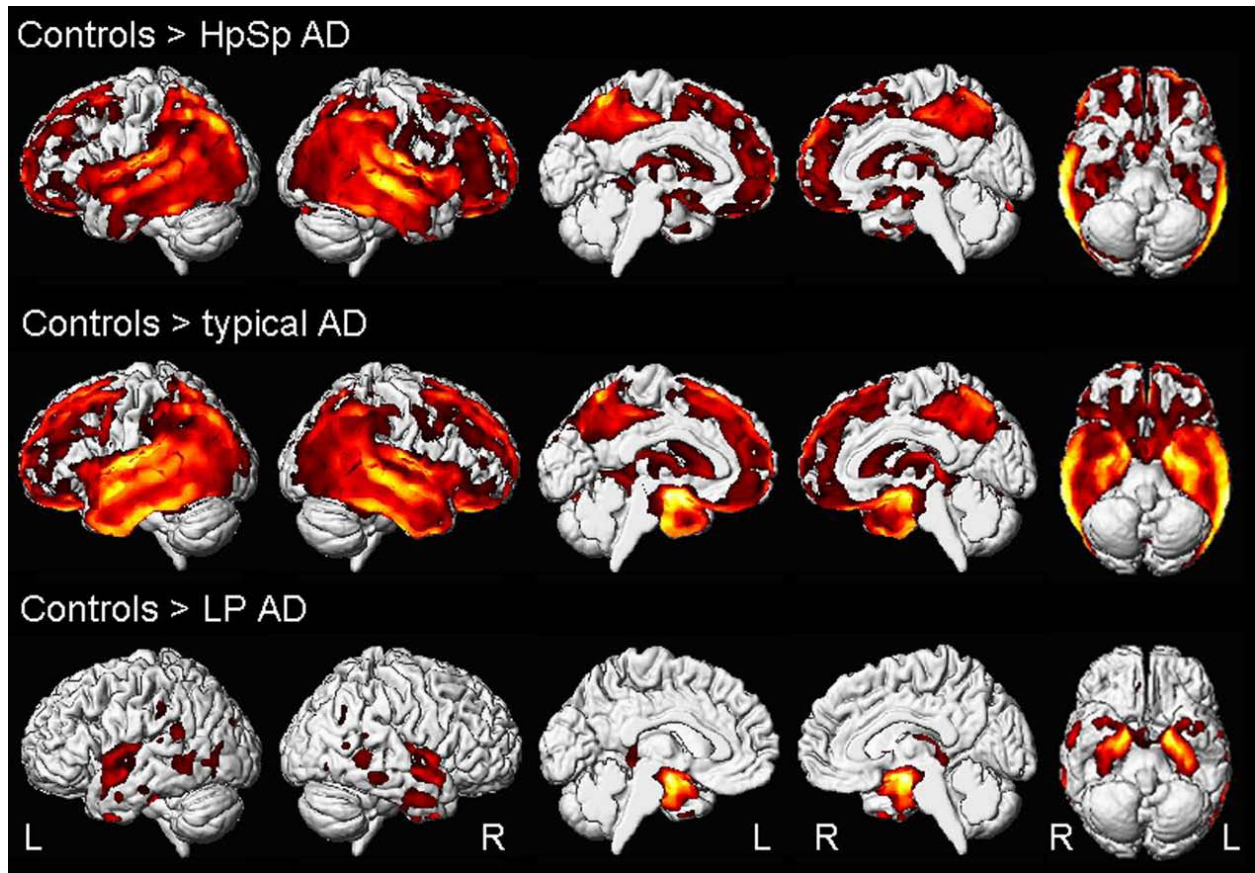

Supplement: NIHMS410987-supplement-01.pdf [file NIHMS410987-supplement-01.pdf]
